# Supplementary material
Source: PubMed Central journal article supplement (PMC9998314)
Supplement: 277_2023_5142_MOESM1_ESM.pdf [file 277_2023_5142_MOESM1_ESM.pdf]

**Supplemental Figure 1. Anti-SARS-CoV-2 S antibody titers at 3 months and 9 months after the second vaccination in patients who were receiving or not receiving active treatment.**

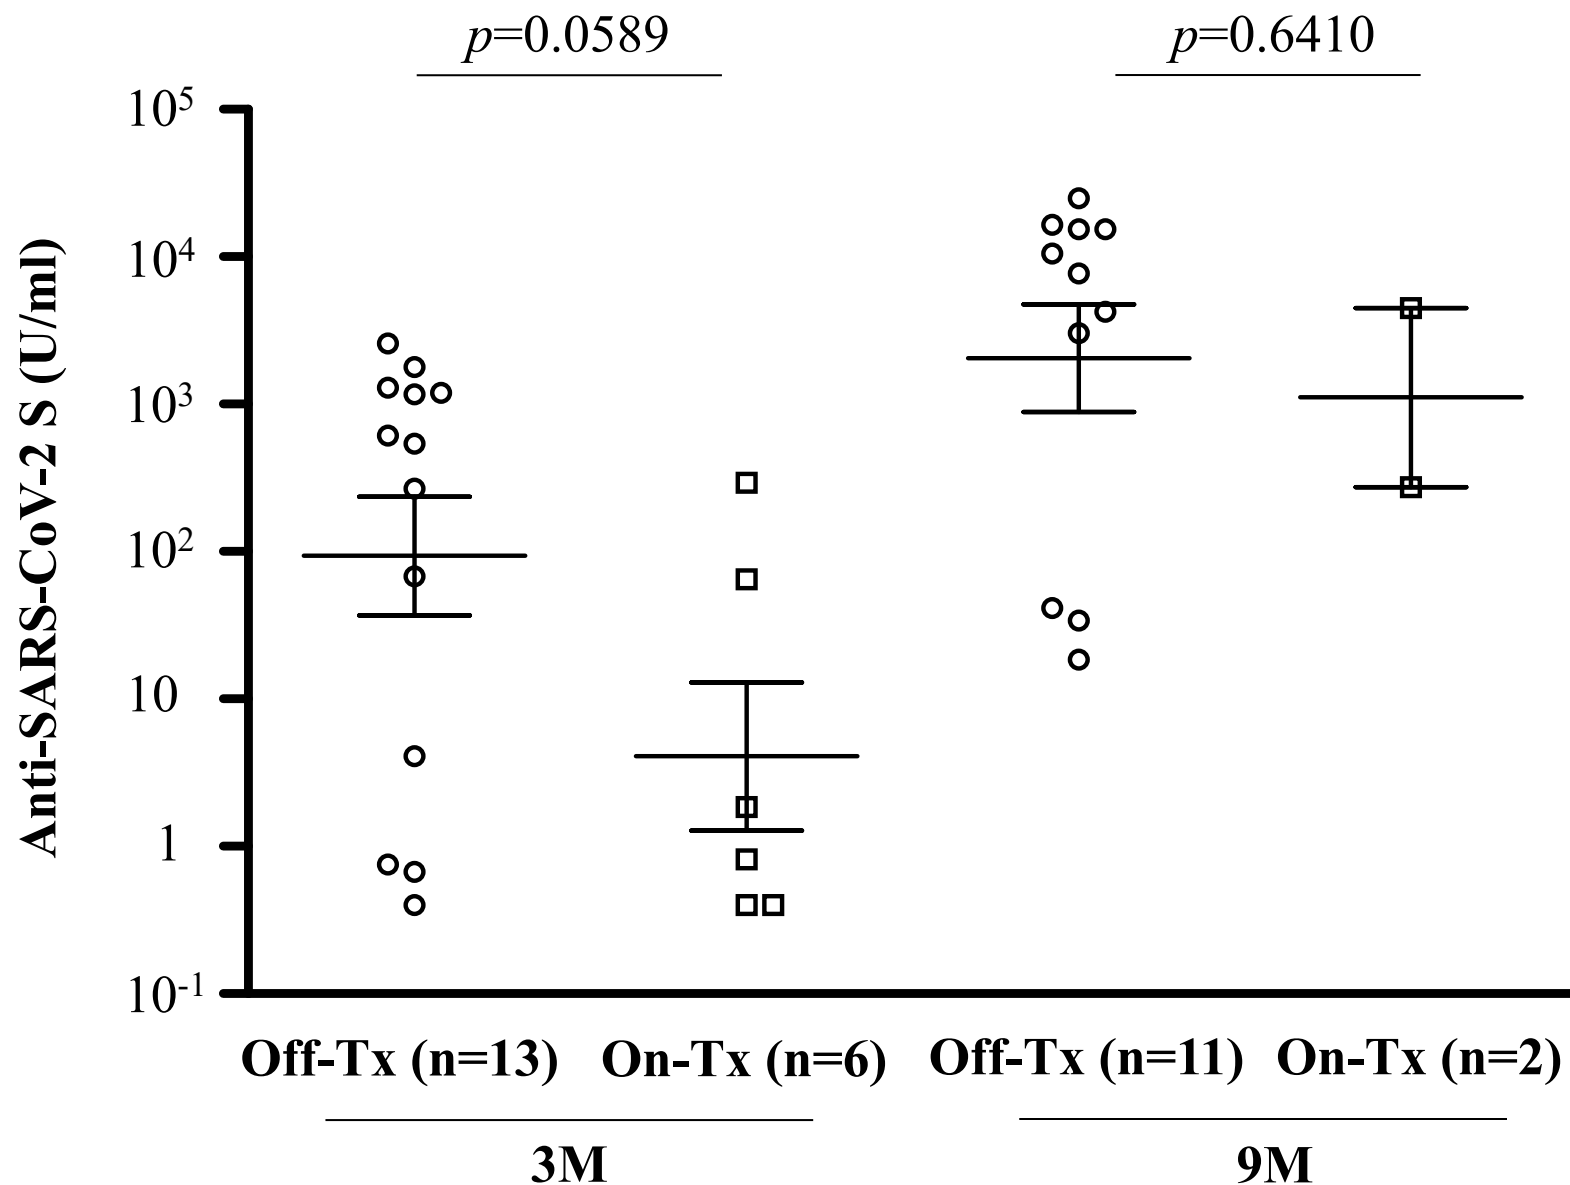

Anti-SARS-CoV-2 S antibody titers at 3 months and 9 months after the second vaccination in patients who were receiving or not receiving active treatment. Individuals who did not receive a third dose prior to the 9-month blood sampling were excluded from the analysis of 9-month blood sampling. The Mann-Whitney *U* test was used to compare medians of antibody titers. The two short lines show interquartile range (IQR) and the center long line shows the median. Off-Tx, off treatment. On-Tx, on treatment. M, months.

**Supplemental Figure 2. Anti-SARS-CoV-2 S antibody titers at 3 months and 9 months after the second vaccination in patients with CR and in patients with non-CR.**

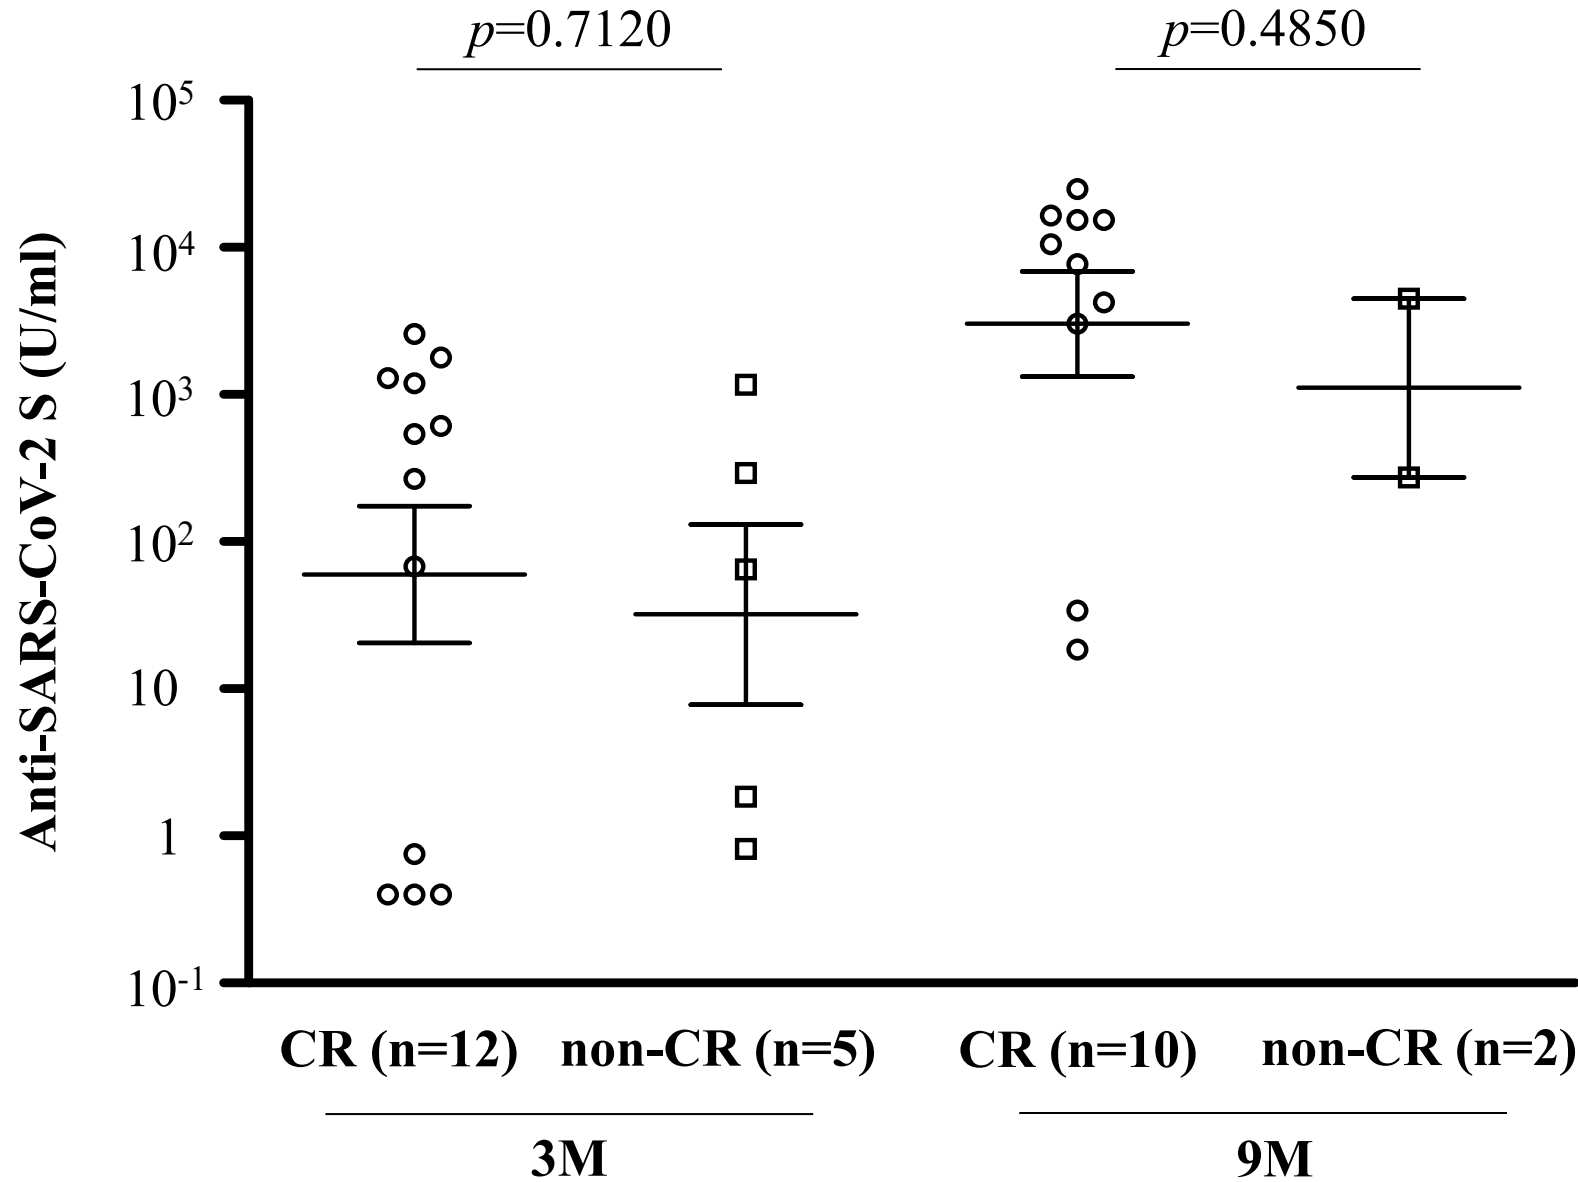

Anti-SARS-CoV-2 S antibody titers at 3 months and 9 months after the second vaccination in patients with CR and in patients with non-CR. Individuals who did not receive a third dose prior to the 9-month blood sampling were excluded from the analysis of 9-month blood sampling. The Mann-Whitney  $U$  test was used to compare medians of antibody titers. The two short lines show interquartile range (IQR) and the center long line shows the median. CR, complete response. M, months.

### Supplemental Figure 3. Dynamics of antibody titers in each patient.

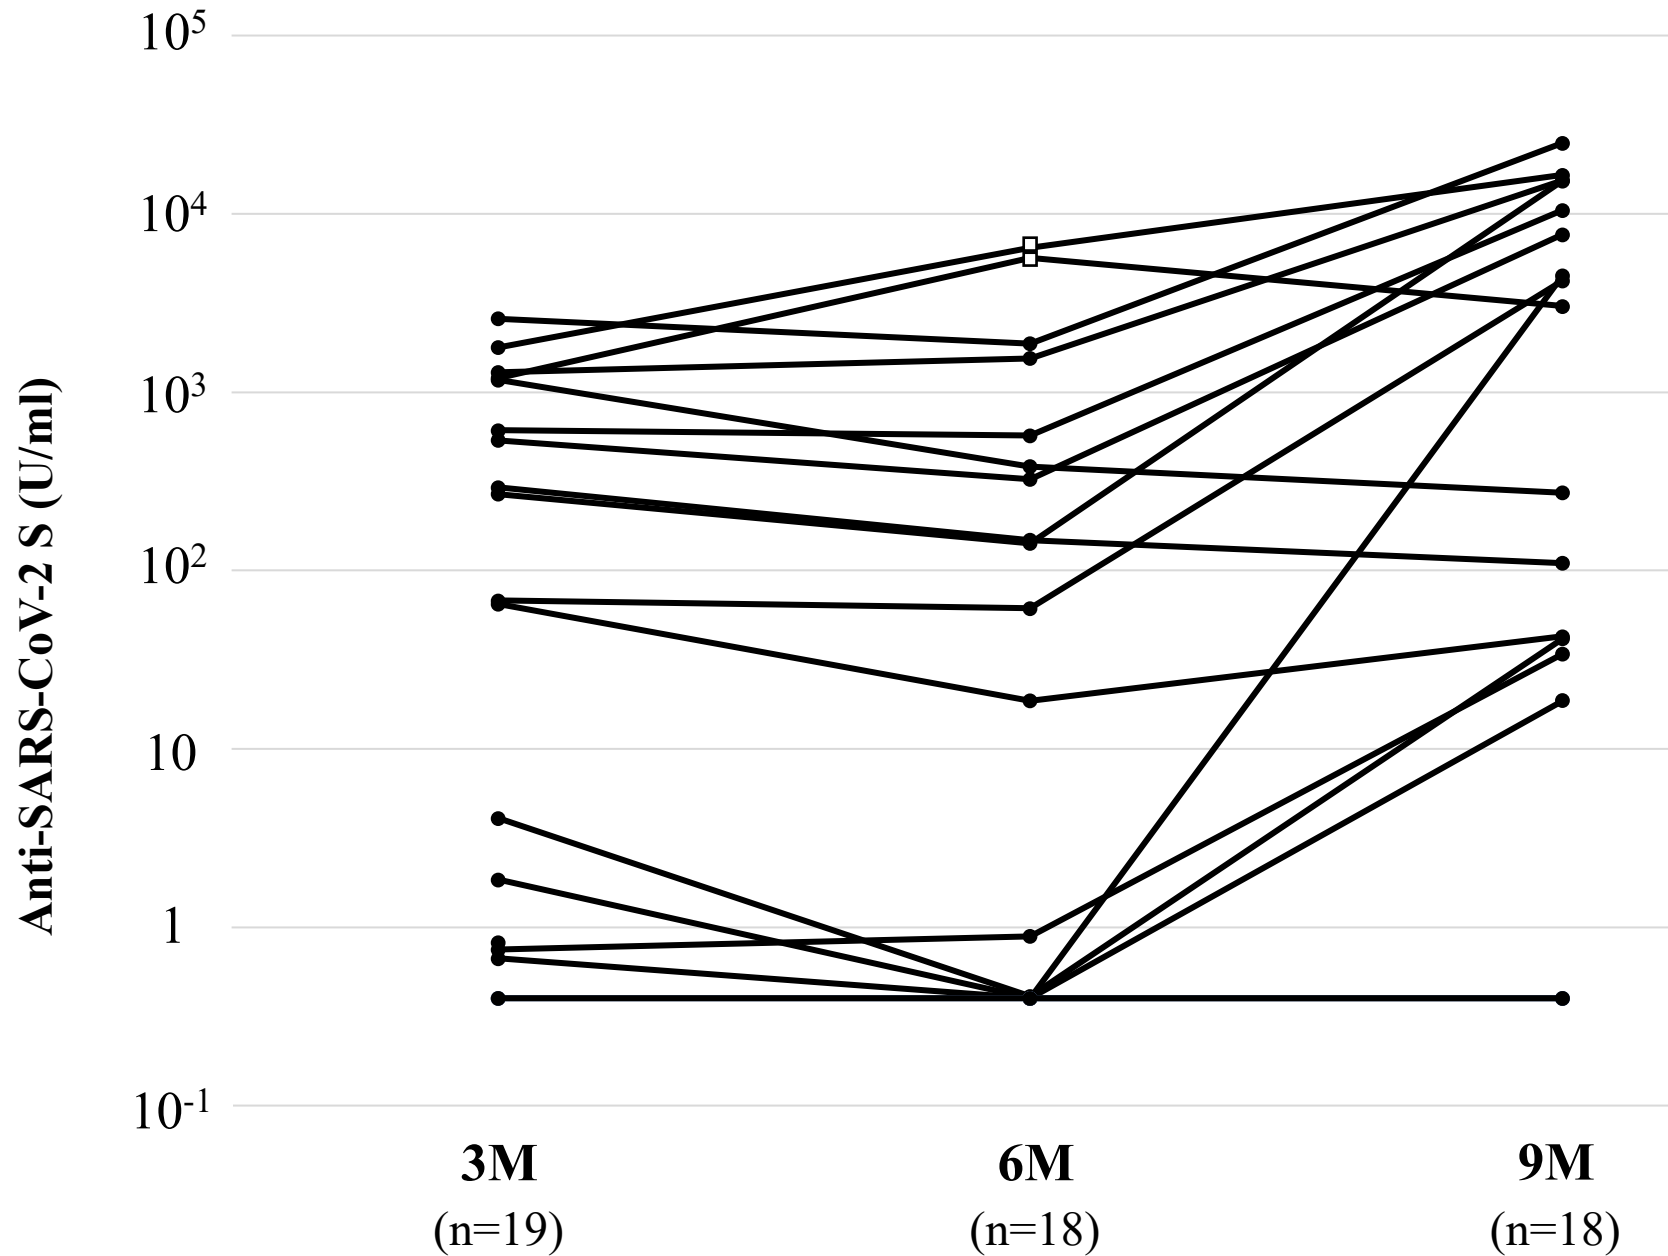

Dynamics of antibody titers in each patient. Each dot represents anti-SARS-CoV-2 S antibody titers at 3 months, 6 months, and 9 months after the second vaccination in patients. The square plots shows two patients who had received the booster vaccine before the day of 6-month blood sampling. M, months.
